CORRECTION

# Correction: Multivariate Meta-Analysis of Genetic Association Studies: A Simulation Study

The *PLOS ONE* Staff

## Notice of Republication

This article was republished on October 9, 2015, to correct errors in equations and formatting that were introduced during the typesetting process. The publisher apologizes for the errors. Please download this article again to view the correct version. The originally published, uncorrected article and the republished, corrected article are provided here for reference.

## Supporting Information

**S1 File. Originally published, uncorrected article.**

(PDF)

**S2 File. Republished, corrected article.**

(PDF)

## Reference

1. Neupane B, Beyene J (2015) Multivariate Meta-Analysis of Genetic Association Studies: A Simulation Study. *PLoS ONE* 10(7): e0133243. doi: [10.1371/journal.pone.0133243](https://doi.org/10.1371/journal.pone.0133243) PMID: [26196398](https://pubmed.ncbi.nlm.nih.gov/26196398/)

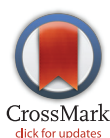

## OPEN ACCESS

**Citation:** The *PLOS ONE* Staff (2015) Correction: Multivariate Meta-Analysis of Genetic Association Studies: A Simulation Study. *PLoS ONE* 10(10): e0141520. doi:10.1371/journal.pone.0141520

**Published:** October 21, 2015

**Copyright:** © 2015 The PLOS ONE Staff. This is an open access article distributed under the terms of the [Creative Commons Attribution License](https://creativecommons.org/licenses/by/4.0/), which permits unrestricted use, distribution, and reproduction in any medium, provided the original author and source are credited.
